# Supplementary material
Source: publisher site journal article supplement (https://www.dovepress.com/article/413887)
Supplement: Supplementary file 1 [file get_supplementary_file.php]

**Supplementary tables**

**Supplementary Table 1.** The top 20 hub genes rank in cytoHubba.

| **MCC** | **DMNC** | **MNC** | **Degree** | **EPC** | **Closeness** | **Radiality** |
| --- | --- | --- | --- | --- | --- | --- |
| CTLA4 | ITK | CTLA4 | CTLA4 | CTLA4 | LCK | LCK |
| LCK | CD3D | LCK | LCK | LCK | CTLA4 | CTLA4 |
| ITK | IL23A | IL7R | SOCS1 | IL7R | SOCS1 | PDGFB |
| IL7R | PRKCQ | SOCS1 | IL7R | SOCS1 | IL7R | SOCS1 |
| CD3D | IL7R | ITK | SOCS3 | ITK | PDGFB | IL7R |
| SOCS1 | IL4R | CD3D | ITK | IL4R | IL4R | PAG1 |
| IL4R | SOCS3 | IL4R | CD3D | CD3D | SOCS3 | IL4R |
| PRKCQ | LCK | SOCS3 | IL4R | SOCS3 | PAG1 | ITGB5 |
| SOCS3 | SOCS1 | PDGFB | PDGFB | PDGFB | ITGB5 | TGFA |
| IL23A | CTLA4 | PRKCQ | PRKCQ | PAG1 | ITK | SOCS3 |
| PDGFB | TGFA | PAG1 | PAG1 | PRKCQ | CD3D | CD3D |
| PAG1 | FGFR1 | IL23A | TGFA | IL23A | TGFA | ITK |
| TGFA | ITGB5 | TGFA | IL23A | ITGB5 | PRKCQ | FGFR1 |
| FGFR1 | IRF7 | FGFR1 | FGFR1 | TGFA | IL23A | PRKCQ |
| RELN | MALT1 | ITGB5 | ITGB5 | MALT1 | FGFR1 | IL23A |
| ITGB5 | PAG1 | IRF7 | RELN | IRF7 | RELN | TNXB |
| VEGFB | PDGFB | MALT1 | VEGFB | FGFR1 | APBA1 | APBA1 |
| TNXB | RELN | RELN | TNXB | APBA1 | TNXB | RELN |
| APBA1 | VEGFB | VEGFB | APBA1 | RELN | VEGFB | VEGFB |
| MCM7 | TNXB | TNXB | IRF7 | TNXB | IRF7 | IRF7 |

**Supplementary Table 2.** Key transcriptional factors (TFs) of hub genes.

| Key TFs | Description | P value | Genes |
| --- | --- | --- | --- |
| SP1 | Sp1 transcription factor | 0.00071 | PDGFB, SOCS1, FGFR1, TGFA |
| E2F1 | E2F transcription factor 1 | 0.00635 | FGFR1, IL23A |
| STAT3 | signal transducer and activator of transcription 3 (acute-phase response factor) | 0.0071 | SOCS1, SOCS3 |
| RELA | v-rel reticuloendotheliosis viral oncogene homolog A (avian) | 0.0295 | IL23A, SOCS3 |
| NFKB1 | nuclear factor of kappa light polypeptide gene enhancer in B-cells 1 | 0.0298 | SOCS3, IL23A |
